# Supplementary material
Source: MDPI journal article supplement (https://www.mdpi.com/2075-4701/13/3/506)
Supplement: s1 [file s1]

# Failure Analysis of a Femoral Cephalomedullary Nail

## Supplementary Material

The eighty material groups of the femoral bone with their densities and the nine elastic constants

| Material Group Number | Density (g/cm <sup>3</sup> ) | E <sub>1</sub> (GPa) | E <sub>2</sub> (GPa) | E <sub>3</sub> (GPa) | $\nu_{12}$ | $\nu_{23}$ | $\nu_{31}$ | G <sub>12</sub> | G <sub>23</sub> | G <sub>31</sub> |
|-----------------------|------------------------------|----------------------|----------------------|----------------------|------------|------------|------------|-----------------|-----------------|-----------------|
| 1                     | 1.00                         | 1.15                 | 1.15                 | 1.89                 | 0.40       | 0.25       | 0.25       | 0.05            | 0.07            | 0.06            |
| 2                     | 1.00                         | 1.15                 | 1.15                 | 1.90                 | 0.40       | 0.25       | 0.25       | 0.05            | 0.07            | 0.06            |
| 3                     | 1.00                         | 1.15                 | 1.15                 | 1.90                 | 0.40       | 0.25       | 0.25       | 0.05            | 0.07            | 0.06            |
| 4                     | 1.00                         | 1.16                 | 1.16                 | 1.90                 | 0.40       | 0.25       | 0.25       | 0.05            | 0.07            | 0.06            |
| 5                     | 1.00                         | 1.16                 | 1.16                 | 1.91                 | 0.40       | 0.25       | 0.25       | 0.05            | 0.07            | 0.06            |
| 6                     | 1.00                         | 1.16                 | 1.16                 | 1.91                 | 0.40       | 0.25       | 0.25       | 0.05            | 0.07            | 0.06            |
| 7                     | 1.00                         | 1.16                 | 1.16                 | 1.91                 | 0.40       | 0.25       | 0.25       | 0.05            | 0.07            | 0.06            |
| 8                     | 1.00                         | 1.16                 | 1.16                 | 1.92                 | 0.40       | 0.25       | 0.25       | 0.05            | 0.07            | 0.06            |
| 9                     | 1.00                         | 1.17                 | 1.17                 | 1.92                 | 0.40       | 0.25       | 0.25       | 0.05            | 0.07            | 0.06            |
| 10                    | 1.01                         | 1.17                 | 1.17                 | 1.92                 | 0.40       | 0.25       | 0.25       | 0.05            | 0.07            | 0.06            |
| 11                    | 1.01                         | 1.17                 | 1.17                 | 1.92                 | 0.40       | 0.25       | 0.25       | 0.05            | 0.07            | 0.06            |
| 12                    | 1.01                         | 1.17                 | 1.17                 | 1.93                 | 0.40       | 0.25       | 0.25       | 0.05            | 0.07            | 0.06            |
| 13                    | 1.01                         | 1.17                 | 1.17                 | 1.93                 | 0.40       | 0.25       | 0.25       | 0.05            | 0.07            | 0.06            |
| 14                    | 1.01                         | 1.18                 | 1.18                 | 1.93                 | 0.40       | 0.25       | 0.25       | 0.05            | 0.07            | 0.06            |
| 15                    | 1.01                         | 1.18                 | 1.18                 | 1.94                 | 0.40       | 0.25       | 0.25       | 0.05            | 0.07            | 0.06            |
| 16                    | 1.01                         | 1.18                 | 1.18                 | 1.94                 | 0.40       | 0.25       | 0.25       | 0.05            | 0.07            | 0.06            |
| 17                    | 1.01                         | 1.18                 | 1.18                 | 1.94                 | 0.40       | 0.25       | 0.25       | 0.05            | 0.07            | 0.06            |
| 18                    | 1.01                         | 1.18                 | 1.18                 | 1.94                 | 0.40       | 0.25       | 0.25       | 0.05            | 0.07            | 0.06            |
| 19                    | 1.01                         | 1.19                 | 1.19                 | 1.95                 | 0.40       | 0.25       | 0.25       | 0.06            | 0.07            | 0.06            |
| 20                    | 1.02                         | 1.19                 | 1.19                 | 1.95                 | 0.40       | 0.25       | 0.25       | 0.06            | 0.07            | 0.06            |
| 21                    | 1.02                         | 1.19                 | 1.19                 | 1.95                 | 0.40       | 0.25       | 0.25       | 0.06            | 0.07            | 0.06            |
| 22                    | 1.02                         | 1.19                 | 1.19                 | 1.96                 | 0.40       | 0.25       | 0.25       | 0.06            | 0.07            | 0.06            |
| 23                    | 1.02                         | 1.19                 | 1.19                 | 1.96                 | 0.40       | 0.25       | 0.25       | 0.06            | 0.07            | 0.06            |
| 24                    | 1.02                         | 1.20                 | 1.20                 | 1.96                 | 0.40       | 0.25       | 0.25       | 0.06            | 0.07            | 0.06            |
| 25                    | 1.02                         | 1.20                 | 1.20                 | 1.97                 | 0.40       | 0.25       | 0.25       | 0.06            | 0.07            | 0.06            |
| 26                    | 1.02                         | 1.20                 | 1.20                 | 1.97                 | 0.40       | 0.25       | 0.25       | 0.06            | 0.07            | 0.06            |
| 27                    | 1.02                         | 1.20                 | 1.20                 | 1.97                 | 0.40       | 0.25       | 0.25       | 0.06            | 0.07            | 0.06            |
| 28                    | 1.02                         | 1.20                 | 1.20                 | 1.97                 | 0.40       | 0.25       | 0.25       | 0.06            | 0.07            | 0.06            |
| 29                    | 1.02                         | 1.21                 | 1.21                 | 1.98                 | 0.40       | 0.25       | 0.25       | 0.06            | 0.07            | 0.06            |
| 30                    | 1.02                         | 1.21                 | 1.21                 | 1.98                 | 0.40       | 0.25       | 0.25       | 0.06            | 0.07            | 0.06            |
| 31                    | 1.03                         | 1.21                 | 1.21                 | 1.98                 | 0.40       | 0.25       | 0.25       | 0.06            | 0.07            | 0.06            |
| 32                    | 1.03                         | 1.21                 | 1.21                 | 1.99                 | 0.40       | 0.25       | 0.25       | 0.06            | 0.07            | 0.06            |
| 33                    | 1.03                         | 1.21                 | 1.21                 | 1.99                 | 0.40       | 0.25       | 0.25       | 0.06            | 0.07            | 0.07            |
| 34                    | 1.03                         | 1.22                 | 1.22                 | 1.99                 | 0.40       | 0.25       | 0.25       | 0.06            | 0.07            | 0.07            |
| 35                    | 1.03                         | 1.22                 | 1.22                 | 1.99                 | 0.40       | 0.25       | 0.25       | 0.06            | 0.07            | 0.07            |
| 36                    | 1.03                         | 1.22                 | 1.22                 | 2.00                 | 0.40       | 0.25       | 0.25       | 0.06            | 0.07            | 0.07            |
| 37                    | 1.03                         | 1.22                 | 1.22                 | 2.00                 | 0.40       | 0.25       | 0.25       | 0.06            | 0.07            | 0.07            |
| 38                    | 1.03                         | 1.22                 | 1.22                 | 2.00                 | 0.40       | 0.25       | 0.25       | 0.06            | 0.07            | 0.07            |
| 39                    | 1.03                         | 1.22                 | 1.22                 | 2.01                 | 0.40       | 0.25       | 0.25       | 0.06            | 0.07            | 0.07            |
| 40                    | 1.03                         | 1.23                 | 1.23                 | 2.01                 | 0.40       | 0.25       | 0.25       | 0.06            | 0.07            | 0.07            |
| 41                    | 1.03                         | 1.23                 | 1.23                 | 2.01                 | 0.40       | 0.25       | 0.25       | 0.06            | 0.07            | 0.07            |
| 42                    | 1.04                         | 1.23                 | 1.23                 | 2.02                 | 0.40       | 0.25       | 0.25       | 0.06            | 0.07            | 0.07            |
| 43                    | 1.04                         | 1.23                 | 1.23                 | 2.02                 | 0.40       | 0.25       | 0.25       | 0.06            | 0.07            | 0.07            |
| 44                    | 1.04                         | 1.23                 | 1.23                 | 2.02                 | 0.40       | 0.25       | 0.25       | 0.06            | 0.07            | 0.07            |
| 45                    | 1.04                         | 12.36                | 12.36                | 20.24                | 0.40       | 0.25       | 0.25       | 5.37            | 6.68            | 6.19            |
| 46                    | 1.04                         | 12.38                | 12.38                | 20.27                | 0.40       | 0.25       | 0.25       | 5.38            | 6.70            | 6.20            |

|    |      |       |       |       |      |      |      |      |      |      |
|----|------|-------|-------|-------|------|------|------|------|------|------|
| 47 | 1.04 | 12.40 | 12.40 | 20.30 | 0.40 | 0.25 | 0.25 | 5.39 | 6.71 | 6.21 |
| 48 | 1.04 | 12.42 | 12.42 | 20.33 | 0.40 | 0.25 | 0.25 | 5.40 | 6.72 | 6.22 |
| 49 | 1.04 | 12.44 | 12.44 | 20.36 | 0.40 | 0.25 | 0.25 | 5.41 | 6.73 | 6.23 |
| 50 | 1.04 | 12.46 | 12.46 | 20.39 | 0.40 | 0.25 | 0.25 | 5.42 | 6.74 | 6.24 |
| 51 | 1.04 | 12.48 | 12.48 | 20.42 | 0.40 | 0.25 | 0.25 | 5.43 | 6.76 | 6.25 |
| 52 | 1.04 | 12.50 | 12.50 | 20.45 | 0.40 | 0.25 | 0.25 | 5.44 | 6.77 | 6.26 |
| 53 | 1.05 | 12.52 | 12.52 | 20.48 | 0.40 | 0.25 | 0.25 | 5.44 | 6.78 | 6.27 |
| 54 | 1.05 | 12.54 | 12.54 | 20.51 | 0.40 | 0.25 | 0.25 | 5.45 | 6.79 | 6.29 |
| 55 | 1.05 | 12.56 | 12.56 | 20.54 | 0.40 | 0.25 | 0.25 | 5.46 | 6.80 | 6.30 |
| 56 | 1.05 | 12.58 | 12.58 | 20.57 | 0.40 | 0.25 | 0.25 | 5.47 | 6.82 | 6.31 |
| 57 | 1.05 | 12.60 | 12.60 | 20.60 | 0.40 | 0.25 | 0.25 | 5.48 | 6.83 | 6.32 |
| 58 | 1.05 | 12.62 | 12.62 | 20.63 | 0.40 | 0.25 | 0.25 | 5.49 | 6.84 | 6.33 |
| 59 | 1.05 | 12.64 | 12.64 | 20.66 | 0.40 | 0.25 | 0.25 | 5.50 | 6.85 | 6.34 |
| 60 | 1.05 | 12.66 | 12.66 | 20.69 | 0.40 | 0.25 | 0.25 | 5.51 | 6.86 | 6.35 |
| 61 | 1.05 | 12.68 | 12.68 | 20.72 | 0.40 | 0.25 | 0.25 | 5.52 | 6.88 | 6.36 |
| 62 | 1.05 | 12.70 | 12.70 | 20.75 | 0.40 | 0.25 | 0.25 | 5.53 | 6.89 | 6.38 |
| 63 | 1.06 | 12.72 | 12.72 | 20.78 | 0.40 | 0.25 | 0.25 | 5.54 | 6.90 | 6.39 |
| 64 | 1.06 | 12.74 | 12.74 | 20.81 | 0.40 | 0.25 | 0.25 | 5.55 | 6.91 | 6.40 |
| 65 | 1.06 | 12.76 | 12.76 | 20.84 | 0.40 | 0.25 | 0.25 | 5.56 | 6.93 | 6.41 |
| 66 | 1.06 | 12.78 | 12.78 | 20.87 | 0.40 | 0.25 | 0.25 | 5.57 | 6.94 | 6.42 |
| 67 | 1.06 | 12.80 | 12.80 | 20.90 | 0.40 | 0.25 | 0.25 | 5.58 | 6.95 | 6.43 |
| 68 | 1.06 | 12.82 | 12.82 | 20.93 | 0.40 | 0.25 | 0.25 | 5.59 | 6.96 | 6.44 |
| 69 | 1.06 | 12.84 | 12.84 | 20.96 | 0.40 | 0.25 | 0.25 | 5.60 | 6.97 | 6.45 |
| 70 | 1.06 | 12.86 | 12.86 | 20.99 | 0.40 | 0.25 | 0.25 | 5.61 | 6.99 | 6.47 |
| 71 | 1.06 | 12.88 | 12.88 | 21.02 | 0.40 | 0.25 | 0.25 | 5.62 | 7.00 | 6.48 |
| 72 | 1.06 | 12.90 | 12.90 | 21.05 | 0.40 | 0.25 | 0.25 | 5.63 | 7.01 | 6.49 |
| 73 | 1.06 | 12.92 | 12.92 | 21.08 | 0.40 | 0.25 | 0.25 | 5.64 | 7.02 | 6.50 |
| 74 | 1.07 | 12.94 | 12.94 | 21.11 | 0.40 | 0.25 | 0.25 | 5.65 | 7.04 | 6.51 |
| 75 | 1.07 | 12.96 | 12.96 | 21.14 | 0.40 | 0.25 | 0.25 | 5.66 | 7.05 | 6.52 |
| 76 | 1.07 | 12.98 | 12.98 | 21.17 | 0.40 | 0.25 | 0.25 | 5.67 | 7.06 | 6.53 |
| 77 | 1.07 | 13.00 | 13.00 | 21.20 | 0.40 | 0.25 | 0.25 | 5.68 | 7.07 | 6.55 |
| 78 | 1.07 | 13.02 | 13.02 | 21.23 | 0.40 | 0.25 | 0.25 | 5.69 | 7.09 | 6.56 |
| 79 | 1.07 | 13.04 | 13.04 | 21.26 | 0.40 | 0.25 | 0.25 | 5.70 | 7.10 | 6.57 |
| 80 | 1.07 | 13.06 | 13.06 | 21.29 | 0.40 | 0.25 | 0.25 | 5.71 | 7.11 | 6.58 |

**The elasticity tensor components (Stiffness Matrix) for each material group of the femoral bone**

| <b>Material<br/>Group<br/>Number</b> | <b>Density<br/>(g/cm<sup>3</sup>)</b> | <b>C<sub>11</sub></b> | <b>C<sub>22</sub></b> | <b>C<sub>33</sub></b> | <b>C<sub>12</sub></b> | <b>C<sub>13</sub></b> | <b>C<sub>23</sub></b> | <b>C<sub>44</sub></b> | <b>C<sub>55</sub></b> | <b>C<sub>66</sub></b> |
|--------------------------------------|---------------------------------------|-----------------------|-----------------------|-----------------------|-----------------------|-----------------------|-----------------------|-----------------------|-----------------------|-----------------------|
| 1                                    | 1.00                                  | 1.42                  | 1.48                  | 2.19                  | 0.53                  | 0.30                  | 0.24                  | 0.07                  | 0.06                  | 0.05                  |
| 2                                    | 1.00                                  | 1.43                  | 1.54                  | 2.46                  | 0.54                  | 0.30                  | 0.24                  | 0.07                  | 0.06                  | 0.05                  |
| 3                                    | 1.00                                  | 1.43                  | 1.55                  | 2.47                  | 0.54                  | 0.30                  | 0.24                  | 0.07                  | 0.06                  | 0.05                  |
| 4                                    | 1.00                                  | 1.43                  | 1.55                  | 2.48                  | 0.54                  | 0.30                  | 0.24                  | 0.07                  | 0.06                  | 0.05                  |
| 5                                    | 1.00                                  | 1.43                  | 1.56                  | 2.49                  | 0.54                  | 0.30                  | 0.24                  | 0.07                  | 0.06                  | 0.05                  |
| 6                                    | 1.00                                  | 1.44                  | 1.56                  | 2.50                  | 0.54                  | 0.30                  | 0.24                  | 0.07                  | 0.06                  | 0.05                  |
| 7                                    | 1.00                                  | 1.44                  | 1.57                  | 2.52                  | 0.54                  | 0.30                  | 0.24                  | 0.07                  | 0.06                  | 0.05                  |
| 8                                    | 1.00                                  | 1.44                  | 1.57                  | 2.53                  | 0.54                  | 0.30                  | 0.24                  | 0.07                  | 0.06                  | 0.05                  |
| 9                                    | 1.00                                  | 1.44                  | 1.58                  | 2.54                  | 0.54                  | 0.30                  | 0.24                  | 0.07                  | 0.06                  | 0.05                  |
| 10                                   | 1.01                                  | 1.45                  | 1.58                  | 2.55                  | 0.54                  | 0.30                  | 0.24                  | 0.07                  | 0.06                  | 0.05                  |
| 11                                   | 1.01                                  | 1.45                  | 1.59                  | 2.57                  | 0.54                  | 0.30                  | 0.24                  | 0.07                  | 0.06                  | 0.05                  |
| 12                                   | 1.01                                  | 1.45                  | 1.59                  | 2.58                  | 0.54                  | 0.30                  | 0.24                  | 0.07                  | 0.06                  | 0.05                  |
| 13                                   | 1.01                                  | 1.45                  | 1.60                  | 2.59                  | 0.55                  | 0.30                  | 0.24                  | 0.07                  | 0.06                  | 0.05                  |
| 14                                   | 1.01                                  | 1.45                  | 1.60                  | 2.60                  | 0.55                  | 0.30                  | 0.24                  | 0.07                  | 0.06                  | 0.05                  |
| 15                                   | 1.01                                  | 1.46                  | 1.61                  | 2.61                  | 0.55                  | 0.30                  | 0.24                  | 0.07                  | 0.06                  | 0.05                  |
| 16                                   | 1.01                                  | 1.46                  | 1.61                  | 2.63                  | 0.55                  | 0.30                  | 0.24                  | 0.07                  | 0.06                  | 0.05                  |
| 17                                   | 1.01                                  | 1.46                  | 1.62                  | 2.64                  | 0.55                  | 0.31                  | 0.24                  | 0.07                  | 0.06                  | 0.05                  |
| 18                                   | 1.01                                  | 1.46                  | 1.62                  | 2.65                  | 0.55                  | 0.31                  | 0.24                  | 0.07                  | 0.06                  | 0.05                  |
| 19                                   | 1.01                                  | 1.47                  | 1.63                  | 2.67                  | 0.55                  | 0.31                  | 0.24                  | 0.07                  | 0.06                  | 0.06                  |
| 20                                   | 1.02                                  | 1.47                  | 1.64                  | 2.68                  | 0.55                  | 0.31                  | 0.25                  | 0.07                  | 0.06                  | 0.06                  |
| 21                                   | 1.02                                  | 1.47                  | 1.64                  | 2.69                  | 0.55                  | 0.31                  | 0.25                  | 0.07                  | 0.06                  | 0.06                  |
| 22                                   | 1.02                                  | 1.47                  | 1.65                  | 2.70                  | 0.55                  | 0.31                  | 0.25                  | 0.07                  | 0.06                  | 0.06                  |
| 23                                   | 1.02                                  | 1.48                  | 1.65                  | 2.72                  | 0.55                  | 0.31                  | 0.25                  | 0.07                  | 0.06                  | 0.06                  |
| 24                                   | 1.02                                  | 1.48                  | 1.66                  | 2.73                  | 0.55                  | 0.31                  | 0.25                  | 0.07                  | 0.06                  | 0.06                  |
| 25                                   | 1.02                                  | 1.48                  | 1.66                  | 2.74                  | 0.56                  | 0.31                  | 0.25                  | 0.07                  | 0.06                  | 0.06                  |
| 26                                   | 1.02                                  | 1.48                  | 1.67                  | 2.76                  | 0.56                  | 0.31                  | 0.25                  | 0.07                  | 0.06                  | 0.06                  |
| 27                                   | 1.02                                  | 1.49                  | 1.67                  | 2.77                  | 0.56                  | 0.31                  | 0.25                  | 0.07                  | 0.06                  | 0.06                  |
| 28                                   | 1.02                                  | 1.49                  | 1.68                  | 2.78                  | 0.56                  | 0.31                  | 0.25                  | 0.07                  | 0.06                  | 0.06                  |
| 29                                   | 1.02                                  | 1.49                  | 1.68                  | 2.80                  | 0.56                  | 0.31                  | 0.25                  | 0.07                  | 0.06                  | 0.06                  |
| 30                                   | 1.02                                  | 1.49                  | 1.69                  | 2.81                  | 0.56                  | 0.31                  | 0.25                  | 0.07                  | 0.06                  | 0.06                  |
| 31                                   | 1.03                                  | 1.50                  | 1.70                  | 2.82                  | 0.56                  | 0.31                  | 0.25                  | 0.07                  | 0.06                  | 0.06                  |
| 32                                   | 1.03                                  | 1.50                  | 1.70                  | 2.84                  | 0.56                  | 0.31                  | 0.25                  | 0.07                  | 0.06                  | 0.06                  |
| 33                                   | 1.03                                  | 1.50                  | 1.71                  | 2.85                  | 0.56                  | 0.31                  | 0.25                  | 0.07                  | 0.07                  | 0.06                  |
| 34                                   | 1.03                                  | 1.50                  | 1.71                  | 2.86                  | 0.56                  | 0.31                  | 0.25                  | 0.07                  | 0.07                  | 0.06                  |
| 35                                   | 1.03                                  | 1.51                  | 1.72                  | 2.88                  | 0.56                  | 0.31                  | 0.25                  | 0.07                  | 0.07                  | 0.06                  |
| 36                                   | 1.03                                  | 1.51                  | 1.72                  | 2.89                  | 0.57                  | 0.31                  | 0.25                  | 0.07                  | 0.07                  | 0.06                  |
| 37                                   | 1.03                                  | 1.51                  | 1.73                  | 2.90                  | 0.57                  | 0.32                  | 0.25                  | 0.07                  | 0.07                  | 0.06                  |
| 38                                   | 1.03                                  | 1.51                  | 1.73                  | 2.92                  | 0.57                  | 0.32                  | 0.25                  | 0.07                  | 0.07                  | 0.06                  |
| 39                                   | 1.03                                  | 1.52                  | 1.74                  | 2.93                  | 0.57                  | 0.32                  | 0.25                  | 0.07                  | 0.07                  | 0.06                  |
| 40                                   | 1.03                                  | 1.52                  | 1.75                  | 2.94                  | 0.57                  | 0.32                  | 0.25                  | 0.07                  | 0.07                  | 0.06                  |
| 41                                   | 1.03                                  | 1.52                  | 1.75                  | 2.96                  | 0.57                  | 0.32                  | 0.25                  | 0.07                  | 0.07                  | 0.06                  |
| 42                                   | 1.04                                  | 1.52                  | 1.76                  | 2.97                  | 0.57                  | 0.32                  | 0.25                  | 0.07                  | 0.07                  | 0.06                  |
| 43                                   | 1.04                                  | 1.53                  | 1.76                  | 2.99                  | 0.57                  | 0.32                  | 0.25                  | 0.07                  | 0.07                  | 0.06                  |
| 44                                   | 1.04                                  | 1.53                  | 1.77                  | 3.00                  | 0.57                  | 0.32                  | 0.26                  | 0.07                  | 0.07                  | 0.06                  |
| 45                                   | 1.04                                  | 15.30                 | 15.93                 | 23.37                 | 5.74                  | 3.19                  | 2.55                  | 6.68                  | 6.19                  | 5.37                  |
| 46                                   | 1.04                                  | 15.32                 | 15.96                 | 23.40                 | 5.75                  | 3.19                  | 2.55                  | 6.70                  | 6.20                  | 5.38                  |
| 47                                   | 1.04                                  | 15.34                 | 15.98                 | 23.44                 | 5.75                  | 3.20                  | 2.56                  | 6.71                  | 6.21                  | 5.39                  |
| 48                                   | 1.04                                  | 15.37                 | 16.01                 | 23.47                 | 5.76                  | 3.20                  | 2.56                  | 6.72                  | 6.22                  | 5.40                  |
| 49                                   | 1.04                                  | 15.39                 | 16.03                 | 23.51                 | 5.77                  | 3.21                  | 2.57                  | 6.73                  | 6.23                  | 5.41                  |
| 50                                   | 1.04                                  | 15.42                 | 16.06                 | 23.54                 | 5.78                  | 3.21                  | 2.57                  | 6.74                  | 6.24                  | 5.42                  |
| 51                                   | 1.04                                  | 15.44                 | 16.09                 | 23.58                 | 5.79                  | 3.22                  | 2.57                  | 6.76                  | 6.25                  | 5.43                  |
| 52                                   | 1.04                                  | 15.47                 | 16.11                 | 23.61                 | 5.80                  | 3.22                  | 2.58                  | 6.77                  | 6.26                  | 5.44                  |

|           |      |       |       |       |      |      |      |      |      |      |
|-----------|------|-------|-------|-------|------|------|------|------|------|------|
| <b>53</b> | 1.05 | 15.49 | 16.14 | 23.65 | 5.81 | 3.23 | 2.58 | 6.78 | 6.27 | 5.44 |
| <b>54</b> | 1.05 | 15.52 | 16.16 | 23.68 | 5.82 | 3.23 | 2.59 | 6.79 | 6.29 | 5.45 |
| <b>55</b> | 1.05 | 15.54 | 16.19 | 23.72 | 5.83 | 3.24 | 2.59 | 6.80 | 6.30 | 5.46 |
| <b>56</b> | 1.05 | 15.57 | 16.21 | 23.75 | 5.84 | 3.24 | 2.59 | 6.82 | 6.31 | 5.47 |
| <b>57</b> | 1.05 | 15.59 | 16.24 | 23.78 | 5.85 | 3.25 | 2.60 | 6.83 | 6.32 | 5.48 |
| <b>58</b> | 1.05 | 15.61 | 16.27 | 23.82 | 5.86 | 3.25 | 2.60 | 6.84 | 6.33 | 5.49 |
| <b>59</b> | 1.05 | 15.64 | 16.29 | 23.85 | 5.87 | 3.26 | 2.61 | 6.85 | 6.34 | 5.50 |
| <b>60</b> | 1.05 | 15.66 | 16.32 | 23.89 | 5.87 | 3.26 | 2.61 | 6.86 | 6.35 | 5.51 |
| <b>61</b> | 1.05 | 15.69 | 16.34 | 23.92 | 5.88 | 3.27 | 2.62 | 6.88 | 6.36 | 5.52 |
| <b>62</b> | 1.05 | 15.71 | 16.37 | 23.96 | 5.89 | 3.27 | 2.62 | 6.89 | 6.38 | 5.53 |
| <b>63</b> | 1.06 | 15.74 | 16.39 | 23.99 | 5.90 | 3.28 | 2.62 | 6.90 | 6.39 | 5.54 |
| <b>64</b> | 1.06 | 15.76 | 16.42 | 24.03 | 5.91 | 3.28 | 2.63 | 6.91 | 6.40 | 5.55 |
| <b>65</b> | 1.06 | 15.79 | 16.45 | 24.06 | 5.92 | 3.29 | 2.63 | 6.93 | 6.41 | 5.56 |
| <b>66</b> | 1.06 | 15.81 | 16.47 | 24.10 | 5.93 | 3.29 | 2.64 | 6.94 | 6.42 | 5.57 |
| <b>67</b> | 1.06 | 15.84 | 16.50 | 24.13 | 5.94 | 3.30 | 2.64 | 6.95 | 6.43 | 5.58 |
| <b>68</b> | 1.06 | 15.86 | 16.52 | 24.17 | 5.95 | 3.31 | 2.64 | 6.96 | 6.44 | 5.59 |
| <b>69</b> | 1.06 | 15.89 | 16.55 | 24.20 | 5.96 | 3.31 | 2.65 | 6.97 | 6.45 | 5.60 |
| <b>70</b> | 1.06 | 15.91 | 16.58 | 24.24 | 5.97 | 3.32 | 2.65 | 6.99 | 6.47 | 5.61 |
| <b>71</b> | 1.06 | 15.94 | 16.60 | 24.27 | 5.98 | 3.32 | 2.66 | 7.00 | 6.48 | 5.62 |
| <b>72</b> | 1.06 | 15.96 | 16.63 | 24.31 | 5.99 | 3.33 | 2.66 | 7.01 | 6.49 | 5.63 |
| <b>73</b> | 1.06 | 15.99 | 16.65 | 24.34 | 6.00 | 3.33 | 2.66 | 7.02 | 6.50 | 5.64 |
| <b>74</b> | 1.07 | 16.01 | 16.68 | 24.38 | 6.00 | 3.34 | 2.67 | 7.04 | 6.51 | 5.65 |
| <b>75</b> | 1.07 | 16.04 | 16.71 | 24.41 | 6.01 | 3.34 | 2.67 | 7.05 | 6.52 | 5.66 |
| <b>76</b> | 1.07 | 16.06 | 16.73 | 24.45 | 6.02 | 3.35 | 2.68 | 7.06 | 6.53 | 5.67 |
| <b>77</b> | 1.07 | 16.09 | 16.76 | 24.48 | 6.03 | 3.35 | 2.68 | 7.07 | 6.55 | 5.68 |
| <b>78</b> | 1.07 | 16.11 | 16.78 | 24.52 | 6.04 | 3.36 | 2.69 | 7.09 | 6.56 | 5.69 |
| <b>79</b> | 1.07 | 16.14 | 16.81 | 24.55 | 6.05 | 3.36 | 2.69 | 7.10 | 6.57 | 5.70 |
| <b>80</b> | 1.07 | 16.16 | 16.84 | 24.59 | 6.06 | 3.37 | 2.69 | 7.11 | 6.58 | 5.71 |
